# Supplementary material for: IGF-1 Upregulates Biglycan and Decorin by Increasing Translation and Reducing ADAMTS5 Expression
Source: MDPI journal article supplement (doi:10.3390/ijms22031403), 2021-01-30
Supplement: s1 [file s1]

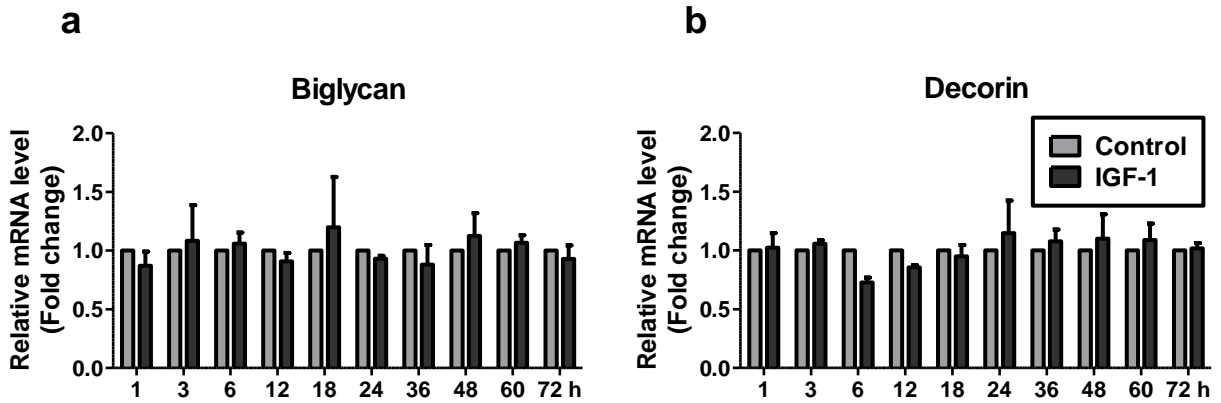

**Figure S1. IGF-1 did not induce biglycan and decorin mRNA expression in NHDFs.**

Primary NHDFs were treated with 250 ng/mL of IGF-1 and harvested according to the time course after treatment. Total RNA was extracted and the mRNA expression of biglycan (a) and decorin (b) in IGF-1-stimulated dermal fibroblasts was measured by quantitative real-time PCR, normalized with 36B4. Values represent the mean  $\pm$  SEM of data (N = 4). Statistical comparison was made using paired *t*-test.

**Table S1. Primer sequences of human genes used for quantitative real-time PCR**

| Target of primer | Sequence                                  |
|------------------|-------------------------------------------|
| <b>Biglycan</b>  | Forward: 5’-GTC TAT CTG CAC TCC AAC AA-3’ |
|                  | Reverse: 5’-TGG ATG GCC AGG CGG TCA GT-3’ |
| <b>Decorin</b>   | Forward: 5’-AGC TGA AGG AAT TGC CAG AA-3’ |
|                  | Reverse: 5’-GCC ATT GTC AAC AGC AGA GA-3’ |
| <b>36B4</b>      | Forward: 5’-TCG ACA ATG GCA GCA TCT AC-3’ |
|                  | Reverse: 5’-TGA TGC AAC AGT TGG GTA GC-3’ |
| <b>ADAMTS5</b>   | Forward: 5’-GCT ACT GCA CAG GGA AGA GG-3’ |
|                  | Reverse: 5’-GGC AGG ACA CCT GCA TAT TT-3’ |
